# Supplementary material for: Flexible cellulose-based piezoelectric composite membrane involving PVDF and BaTiO3 synthesized with the assistance of TEMPO-oxidized cellulose nanofibrils
Source: Royal Society of Chemistry journal article supplement (doi:10.1039/d3ra00604b), 2023-01-01
Supplement: d3ra00604b1.pdf [file d3ra00604b1.pdf]

## Electronic Supplementary Information

### **Flexible cellulose based piezoelectric composite membrane involving PVDF and BaTiO<sub>3</sub> synthesized with the assistance of TEMPO-oxidized cellulose nanofibril**

Meilin Li <sup>a,b</sup>, Bei Jiang <sup>a,b</sup>, Shuoang Cao <sup>a,b</sup>, Xinyi Song <sup>a,b</sup>, Yuanqiao Zhang <sup>a,b</sup>, Lijun Huang <sup>a,b</sup>,  
Quanping Yuan <sup>a,b\*</sup>

<sup>a</sup> *School of Resources, Environment and Materials, Guangxi University, Nanning 530004, China;* <sup>b</sup>*MOE Key Laboratory of New Processing Technology for Non-ferrous Metals and Materials & Guangxi Key Laboratory of Processing for Non-ferrous Metals and Featured Materials, Guangxi University, Nanning 530004, China.*

*\*Corresponding authors. E-mail addresses: yuanquanping@gxu.edu.cn*

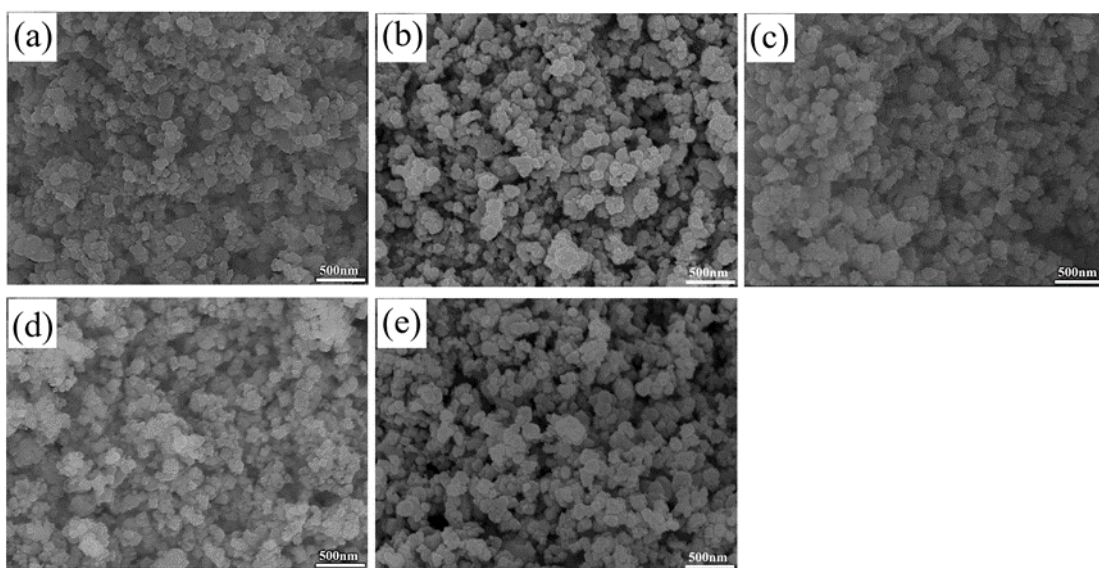

**Fig. S1** FE-SEM images of (a) 4CNF-BaTiO<sub>3</sub>, (b) 6CNF-BaTiO<sub>3</sub>, (c) 8CNF-BaTiO<sub>3</sub>, (d) 12CNF-BaTiO<sub>3</sub>, and (e) 14CNF-BaTiO<sub>3</sub>.

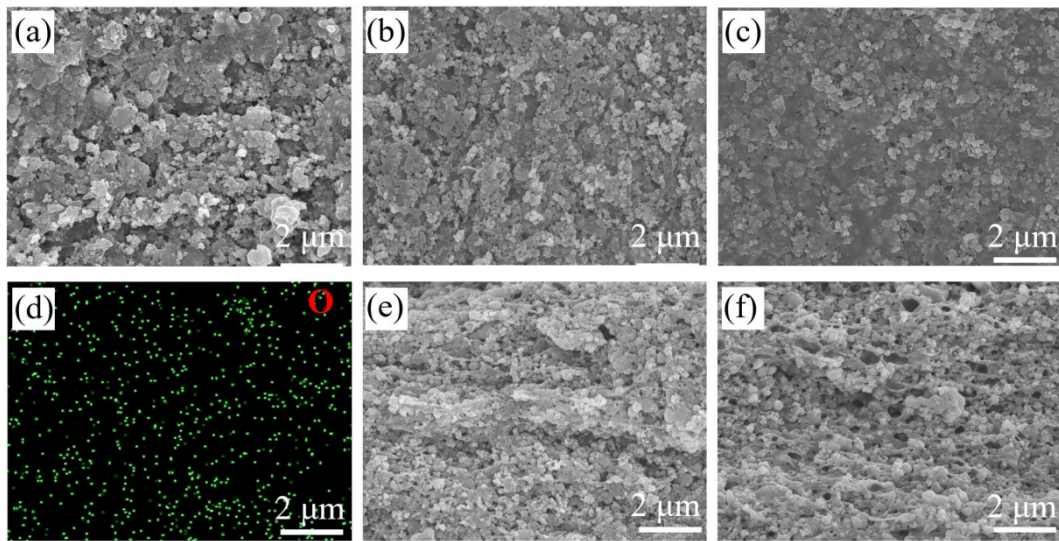

**Fig. S2** Surface FE-SEM images of (a) CNF/PVDF/0CNF-BaTiO<sub>3</sub> composite membrane, (b) un-pressing CNF/PVDF/10CNF-BaTiO<sub>3</sub> composite membrane, (c) hot-pressing CNF/PVDF/10CNF-BaTiO<sub>3</sub> composite membrane. (d) EDS diagram of oxygen element at cross section of CNF/PVDF/10CNF-BaTiO<sub>3</sub> composite membrane. FE-SEM at cross section of (e) un-pressing CNF/PVDF/4CNF-BaTiO<sub>3</sub> composite membrane, (f) hot-pressing CNF/PVDF/4CNF-BaTiO<sub>3</sub> composite membrane.

**Table S1** Particle size analysis results of CNF-BaTiO<sub>3</sub>.

| Samples                  | Grain size | Std Dev | Std Err | PDI   |
|--------------------------|------------|---------|---------|-------|
| 4CNF-BaTiO <sub>3</sub>  | 276.37     | 0.52    | 0.3     | 0.112 |
| 6CNF-BaTiO <sub>3</sub>  | 255.67     | 4.35    | 2.51    | 0.124 |
| 8CNF-BaTiO <sub>3</sub>  | 281.32     | 6.88    | 3.97    | 0.164 |
| 10CNF-BaTiO <sub>3</sub> | 304.99     | 10.67   | 6.16    | 0.18  |
| 12CNF-BaTiO <sub>3</sub> | 262.98     | 5.3     | 3.06    | 0.092 |
| 14CNF-BaTiO <sub>3</sub> | 294.55     | 2.87    | 1.65    | 0.109 |
| 0CNF-BaTiO <sub>3</sub>  | 320.84     | 4.97    | 2.87    | 0.123 |

**Table S2** XRD analysis results of CNF-BaTiO<sub>3</sub>.

| Samples                  | c/a    | FWHM of (200) | Average grain size (nm) | Degree of crystallinity (%) |
|--------------------------|--------|---------------|-------------------------|-----------------------------|
| 4CNF-BaTiO <sub>3</sub>  | 1.0044 | 0.25          | 38.77±4.91              | 85.21                       |
| 6CNF-BaTiO <sub>3</sub>  | 1.0036 | 0.25          | 39.28±5.27              | 89.68                       |
| 8CNF-BaTiO <sub>3</sub>  | 1.0045 | 0.23          | 42.07±5.04              | 78.77                       |
| 10CNF-BaTiO <sub>3</sub> | 1.0029 | 0.24          | 41.86±5.06              | 87.00                       |
| 12CNF-BaTiO <sub>3</sub> | 1.0043 | 0.24          | 40.18±3.53              | 77.47                       |
| 14CNF-BaTiO <sub>3</sub> | 1.0060 | 0.23          | 42.71±4.94              | 82.70                       |
| 0CNF-BaTiO <sub>3</sub>  | 1.0032 | 0.24          | 40.26±5.54              | 76.75                       |

**Table S3** Tensile performance of different un-pressing composite membranes.

| Samples                  | Tensile strength (MPa) | Elongation at break (%) | Young's modulus E (MPa) |
|--------------------------|------------------------|-------------------------|-------------------------|
| 0CNF-BaTiO <sub>3</sub>  | 14.44±2.7              | 3.38±1.41               | 830.94 ± 190.88         |
| 4CNF-BaTiO <sub>3</sub>  | 18.61±3.43             | 3.08±0.32               | 1066.75 ± 360.06        |
| 6CNF-BaTiO <sub>3</sub>  | 16.1±2.52              | 3.15±1.00               | 974.45 ± 190.00         |
| 8CNF-BaTiO <sub>3</sub>  | 16.62±4.62             | 3.65±0.94               | 782.47 ± 143.44         |
| 10CNF-BaTiO <sub>3</sub> | 18.61±3.75             | 3.06±1.33               | 1333.43 ± 618.72        |
| 12CNF-BaTiO <sub>3</sub> | 15.83±4.63             | 3.02±0.34               | 996.30 ± 354.67         |
| 14CNF-BaTiO <sub>3</sub> | 12.13±3.71             | 2.92±1.99               | 852.776 ± 199.93        |
| CNF                      | 24.98±4.17             | 10.13±3.18              | 830.94 ± 190.88         |

**Table S4** Tensile performance of different hot-pressing composite membranes.

| Samples                  | Tensile strength (MPa) | Elongation at break (%) | Young's modulus E (MPa) |
|--------------------------|------------------------|-------------------------|-------------------------|
| 4CNF-BaTiO <sub>3</sub>  | 7.46±1.65              | 5.60±4.34               | 325.50±157.88           |
| 6CNF-BaTiO <sub>3</sub>  | 6.52±1.70              | 8.58±4.59               | 198.68±98.15            |
| 8CNF-BaTiO <sub>3</sub>  | 8.93±1.84              | 3.85±2.76               | 444.60±295.24           |
| 10CNF-BaTiO <sub>3</sub> | 12.91±2.38             | 5.52±1.74               | 357.67±162.17           |
| 12CNF-BaTiO <sub>3</sub> | 17.38±6.11             | 5.49±1.08               | 526.86±176.81           |
| 14CNF-BaTiO <sub>3</sub> | 18.32±3.31             | 4.66±1.32               | 664.83±162.60           |

**Table S5** The piezoelectric constant ( $d_{33}$ ) of PEGs.

| Samples<br>incorporating<br>various CNF                                    | 4CNF            | 6CNF            | 8CNF            | 10CNF           | 12CNF           | 14CNF           | 0CNF            |
|----------------------------------------------------------------------------|-----------------|-----------------|-----------------|-----------------|-----------------|-----------------|-----------------|
| Thickness of the<br>un-pressing<br>composite<br>membrane (mm)              | 0.096±<br>0.005 | 0.098±<br>0.005 | 0.120±<br>0.004 | 0.098±<br>0.011 | 0.110±<br>0.009 | 0.118±<br>0.012 | 0.104±<br>0.004 |
| $d_{33}$ for the un-<br>pressing PEGs<br>( $\text{pC}\cdot\text{N}^{-1}$ ) | 3.00±<br>0.76   | 3.88±<br>1.46   | 4.13±<br>1.13   | 5.25±<br>1.04   | 4.50±<br>0.93   | 4.38±<br>1.77   | 4.28±<br>1.77   |



**Table S6** The piezoelectric constant ( $d_{33}$ ) of hot-pressing PEGs.

| Samples incorporating various CNF                                    | 4CNF        | 6CNF        | 8CNF        | 10CNF       | 12CNF       | 14CNF       | 0CNF        |
|----------------------------------------------------------------------|-------------|-------------|-------------|-------------|-------------|-------------|-------------|
| Thickness of the hot-pressing composite membrane (mm)                | 0.075±0.003 | 0.083±0.006 | 0.076±0.002 | 0.084±0.002 | 0.087±0.002 | 0.073±0.002 | 0.080±0.002 |
| $d_{33}$ for the hot-pressing PEGs ( $\text{pC}\cdot\text{N}^{-1}$ ) | 2.60±0.55   | 3.20±0.45   | 3.60±0.55   | 2.80±0.45   | 2.80±0.44   | 4.00±1.20   | 3.20±0.84   |
